# Supplementary material for: Valence Tautomerism in Chromium Half-Sandwich Triarylmethylium Dyads
Source: MDPI journal article supplement (doi:10.3390/inorganics11110448), 2023-11-20
Supplement: s1 [file s1]

Archive with 1 entries (1 files):
- inorganics-2711416-supplementary.pdf
