# Supplementary material for: Valence Tautomerism in Chromium Half-Sandwich Triarylmethylium Dyads
Source: MDPI journal article supplement (doi:10.3390/inorganics11110448), 2023-11-20
Supplement: s1 [file s1 › inorganics-2711416-supplementary.pdf]

*Supporting Information for*

# **Valence Tautomerism in Chromium Half-Sandwich Triarylmethyl cation Dyads**

**Anja Rehse, Michael Linseis, Mykhailo Azarkh, Malte Drescher and Rainer F. Winter \***

Department of Chemistry, Universität Konstanz, Universitätsstraße 10, 78464 Konstanz, Germany

\* Correspondence: [rainer.winter@uni-konstanz.de](mailto:rainer.winter@uni-konstanz.de)

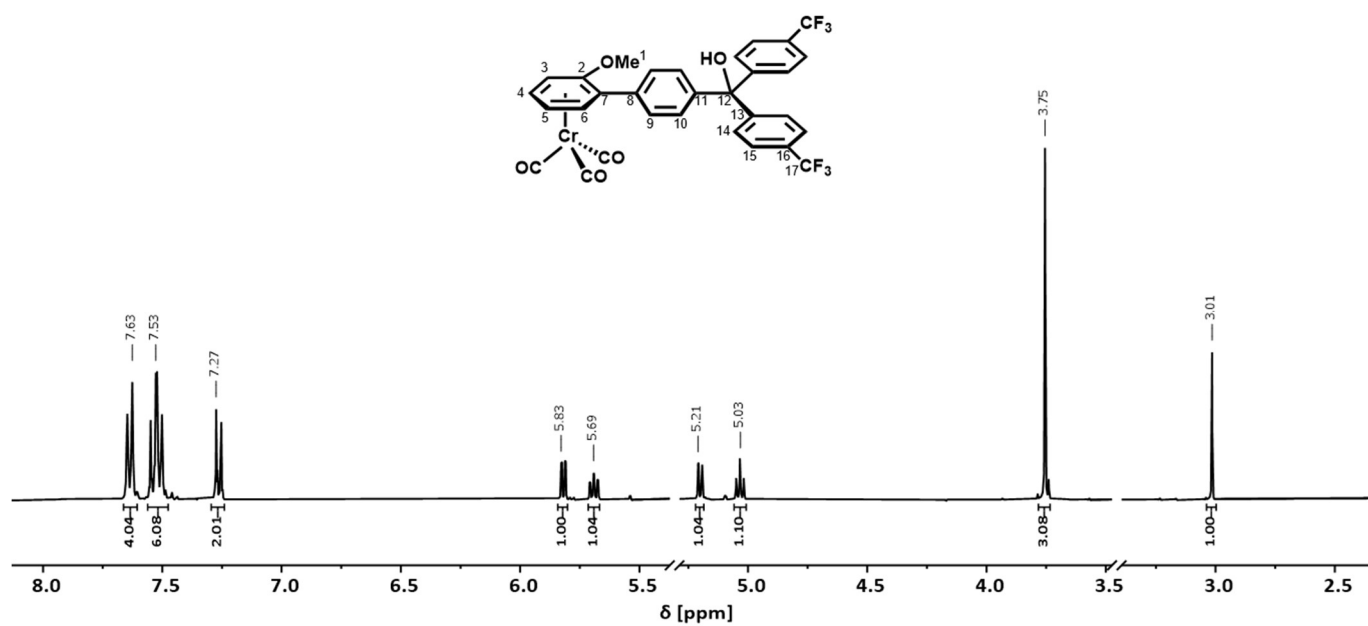

Figure S1. <sup>1</sup>H-NMR spectrum of complex 1-OH (400 MHz, CD<sub>2</sub>Cl<sub>2</sub>).

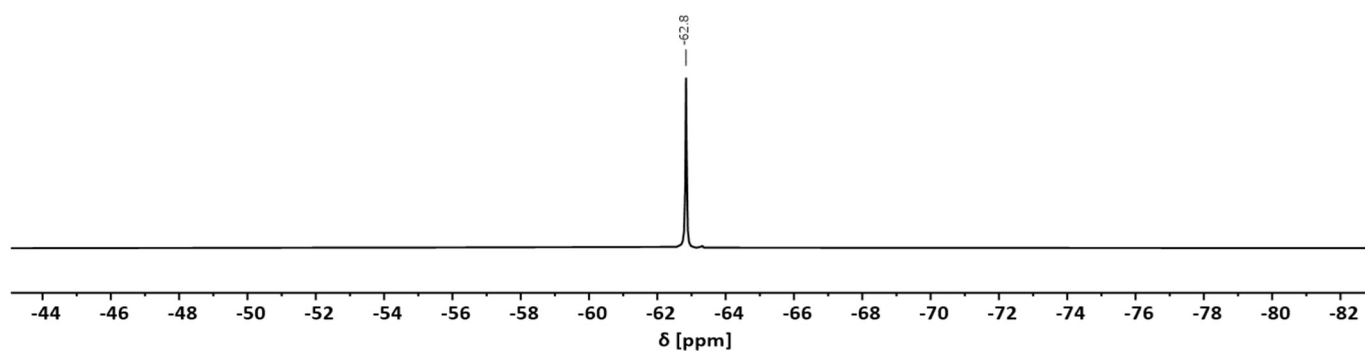

Figure S2. <sup>19</sup>F{<sup>1</sup>H}-NMR spectrum of complex 1-OH (376 MHz, CD<sub>2</sub>Cl<sub>2</sub>).

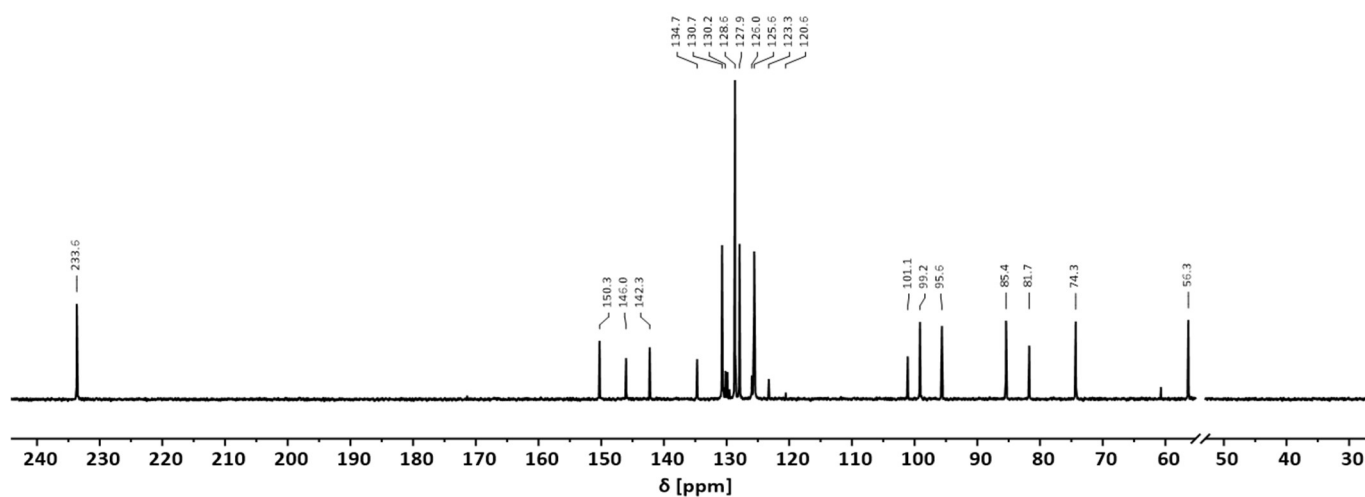

Figure S3. <sup>13</sup>C{<sup>1</sup>H}-NMR spectrum of complex 1-OH (101 MHz, CD<sub>2</sub>Cl<sub>2</sub>).

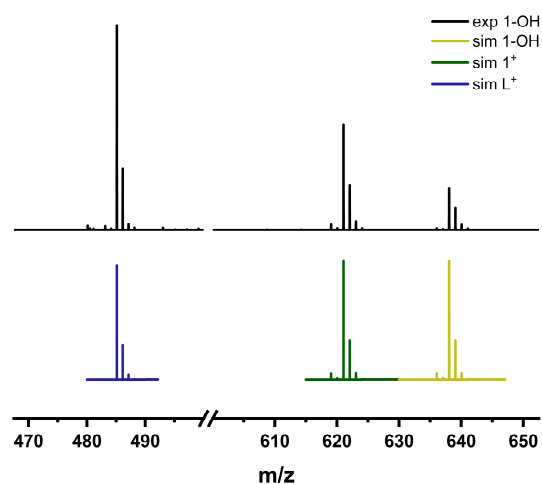

**Figure S4.** Experimental (black) and simulated (carbinol yellow, tritylium complex green, tritylium ligand blue) mass spectrum of complex 1-OH.

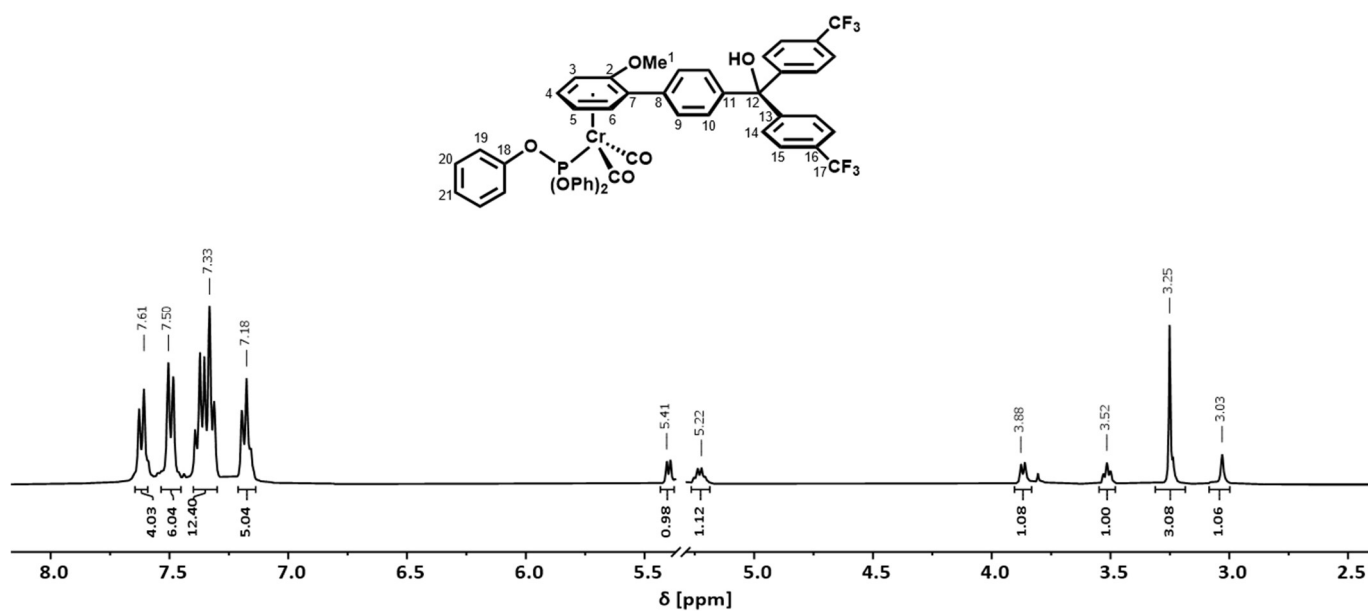

**Figure S5.**  $^1\text{H}$ -NMR spectrum of complex 2-OH (400 MHz,  $\text{CD}_2\text{Cl}_2$ ).

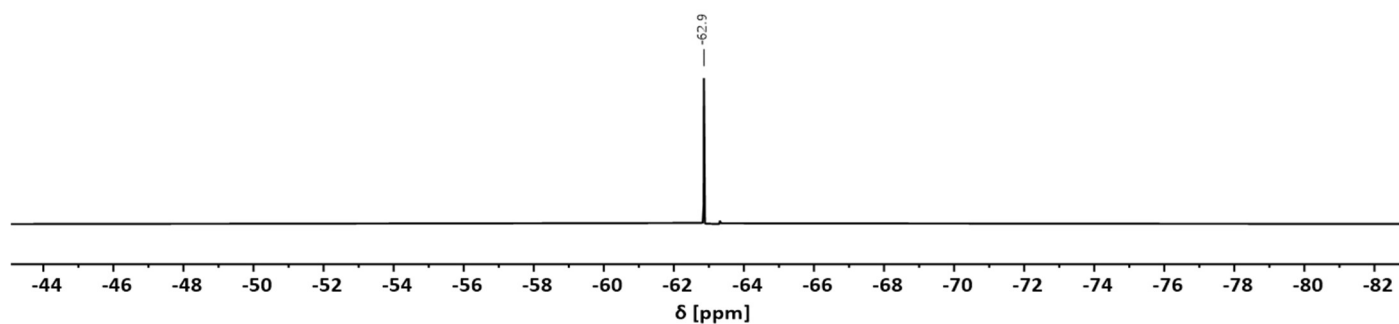

**Figure S6.**  $^{19}\text{F}\{^1\text{H}\}$ -NMR spectrum of complex 2-OH (376 MHz,  $\text{CD}_2\text{Cl}_2$ ).

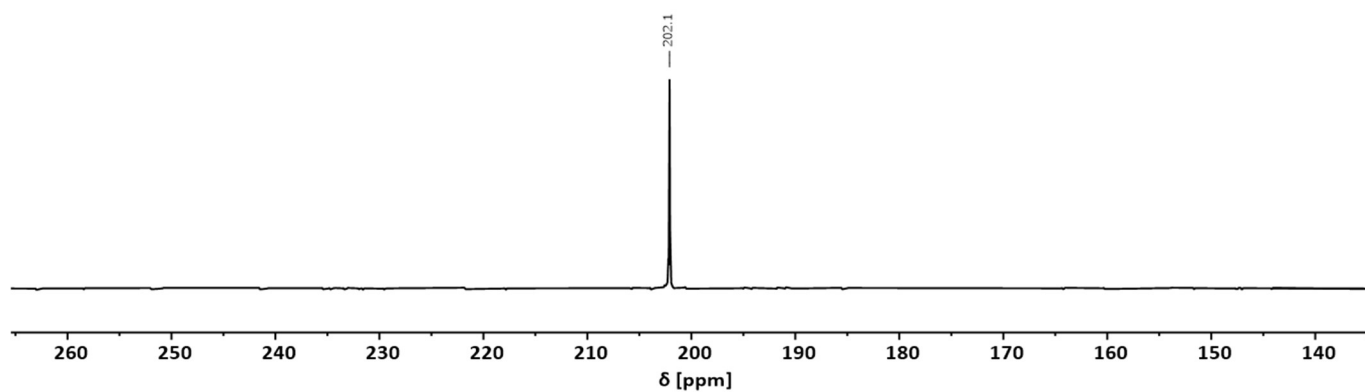

Figure S7.  $^{31}\text{P}\{^1\text{H}\}$ -NMR spectrum of complex **2-OH** (162 MHz,  $\text{CD}_2\text{Cl}_2$ ).

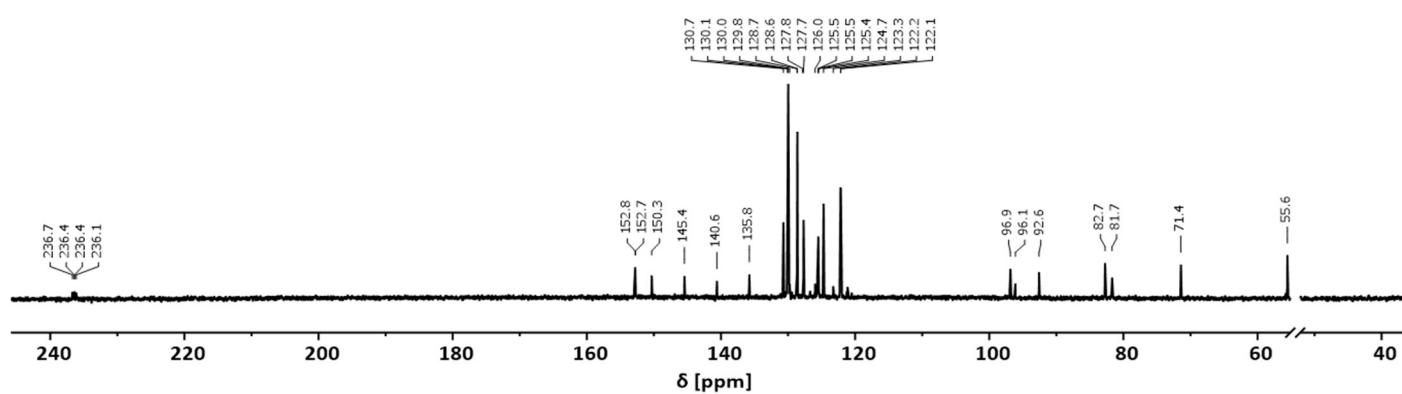

Figure S8.  $^{13}\text{C}\{^1\text{H}\}$ -NMR spectrum of complex **2-OH** (101 MHz,  $\text{CD}_2\text{Cl}_2$ ).

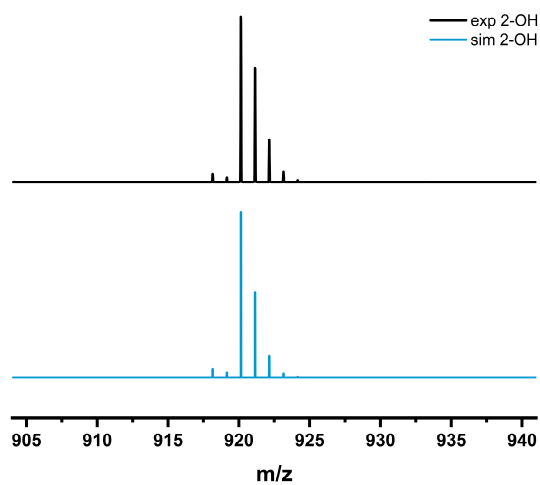

Figure S9. Experimental (black) and simulated (blue) mass spectrum of complex **2-OH**.

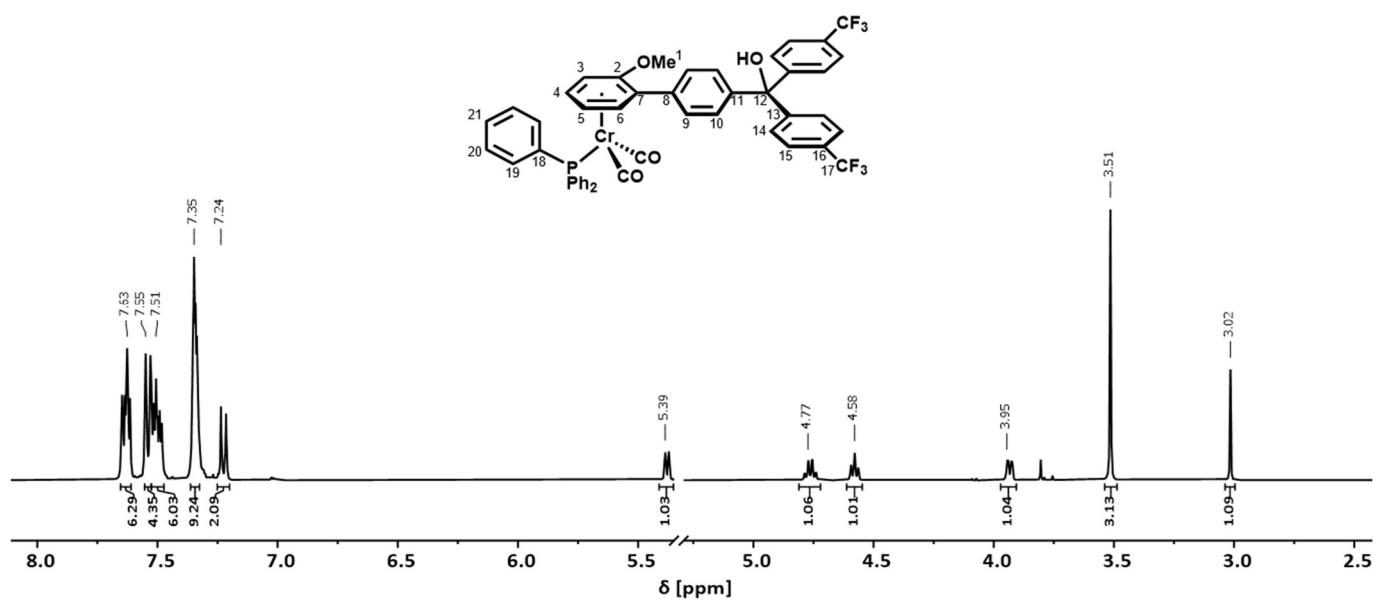

Figure S10.  $^1\text{H}$ -NMR spectrum of complex **3-OH** (400 MHz,  $\text{CD}_2\text{Cl}_2$ ).

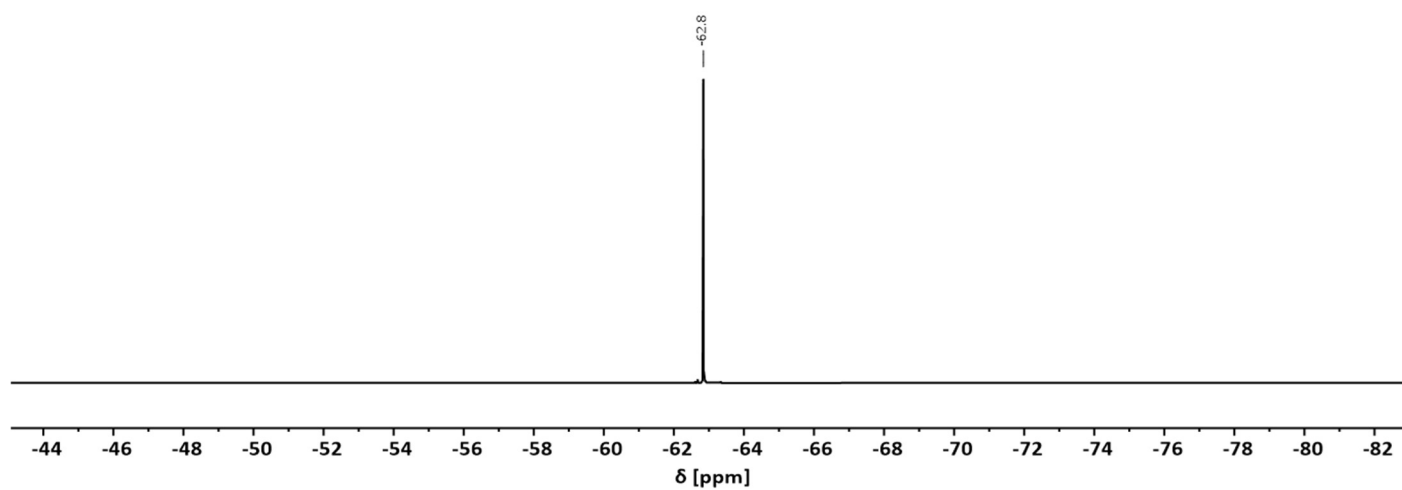

Figure S11.  $^{19}\text{F}\{^1\text{H}\}$ -NMR spectrum of complex **3-OH** (376 MHz,  $\text{CD}_2\text{Cl}_2$ ).

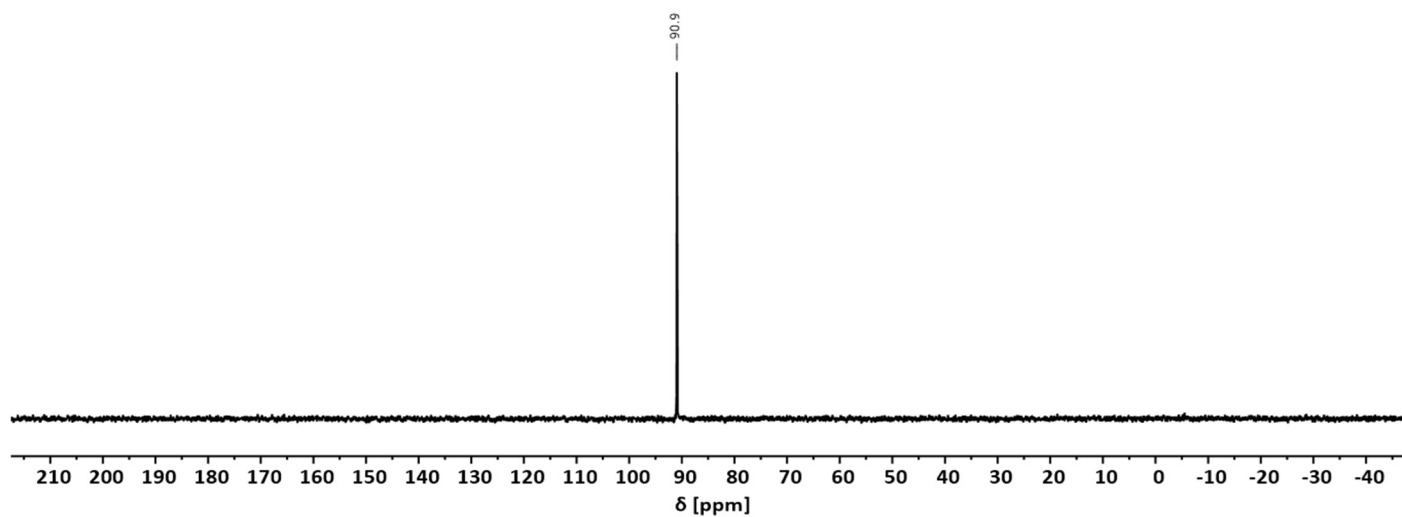

Figure S12.  $^{31}\text{P}\{^1\text{H}\}$ -NMR spectrum of complex **3-OH** (162 MHz,  $\text{CD}_2\text{Cl}_2$ ).

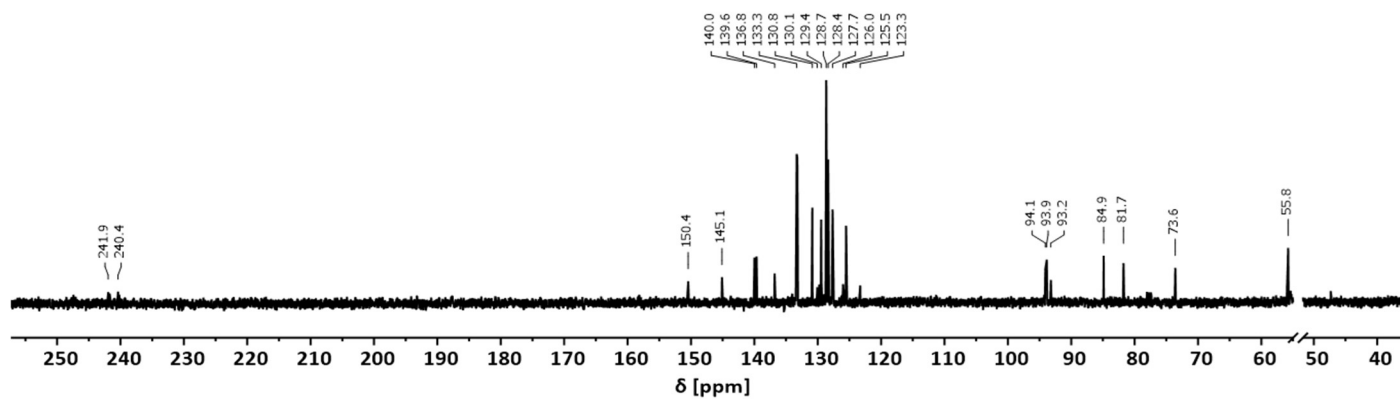

Figure S13.  $^{13}\text{C}\{^1\text{H}\}$ -NMR spectrum of complex 3-OH (101 MHz,  $\text{CD}_2\text{Cl}_2$ ).

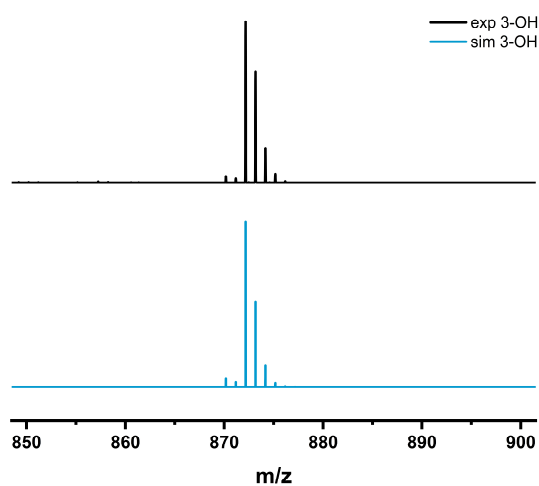

Figure S14. Experimental (black) and simulated (blue) mass spectrum of complex 3-OH.

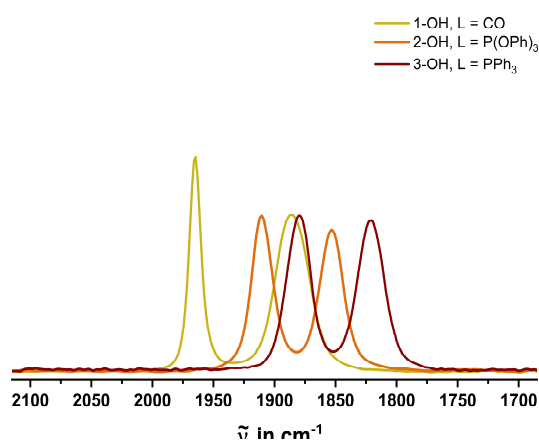

Figure S15. CO stretching vibrations in the IR spectra of complexes 1-OH-3-OH in  $\text{CH}_2\text{Cl}_2$ .

**Table S1.** Crystal data and structure refinement for [(biaryl-ester)Cr(CO)<sub>3</sub>] **1'**.

|                                                              |                                                                              |
|--------------------------------------------------------------|------------------------------------------------------------------------------|
| Empirical formula                                            | CrC <sub>18</sub> O <sub>6</sub> H <sub>14</sub>                             |
| Formula weight                                               | 378.29                                                                       |
| Temperature / K                                              | 100                                                                          |
| Crystal system                                               | triclinic                                                                    |
| Space group                                                  | <i>P</i> -1                                                                  |
| <i>a</i> / Å                                                 | 7.3806(8)                                                                    |
| <i>b</i> / Å                                                 | 9.6181(9)                                                                    |
| <i>c</i> / Å                                                 | 12.1058(12)                                                                  |
| $\alpha$ / °                                                 | 100.346(8)                                                                   |
| $\beta$ / °                                                  | 105.803(8)                                                                   |
| $\gamma$ / °                                                 | 92.640(8)                                                                    |
| Volume / Å <sup>3</sup>                                      | 809.33(15)                                                                   |
| <i>Z</i>                                                     | 2                                                                            |
| $\rho_{\text{calc}}$ / cm <sup>3</sup>                       | 1.552                                                                        |
| $\mu$ / mm <sup>-1</sup>                                     | 0.739                                                                        |
| <i>F</i> (000)                                               | 388.0                                                                        |
| Crystal size / mm <sup>3</sup>                               | 0.2 × 0.2 × 0.2                                                              |
| Radiation                                                    | Mo K $\alpha$ ( $\lambda$ = 0.71073)                                         |
| 2 $\Theta$ range for data collection / °                     | 5.766 to 55.196                                                              |
| Index ranges                                                 | −9 ≤ <i>h</i> ≤ 9, −12 ≤ <i>k</i> ≤ 12, −15 ≤ <i>l</i> ≤ 15                  |
| Reflections collected                                        | 9772                                                                         |
| Independent reflections                                      | 3726 [ <i>R</i> <sub>int</sub> = 0.0413, <i>R</i> <sub>sigma</sub> = 0.0331] |
| Data/restraints/parameters                                   | 3726/0/229                                                                   |
| Goodness-of-fit on <i>F</i> <sup>2</sup>                     | 1.053                                                                        |
| Final <i>R</i> indexes [ <i>I</i> ≥ 2 $\sigma$ ( <i>I</i> )] | <i>R</i> <sub>1</sub> = 0.0714, <i>wR</i> <sub>2</sub> = 0.1894              |
| Final <i>R</i> indexes [all data]                            | <i>R</i> <sub>1</sub> = 0.0809, <i>wR</i> <sub>2</sub> = 0.2049              |
| Largest diff. peak/hole / e Å <sup>-3</sup>                  | 1.86/−1.16                                                                   |

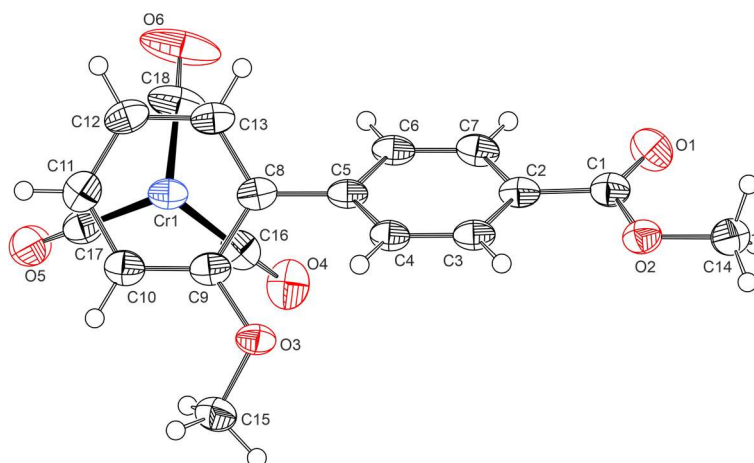**Figure S16.** ORTEP of the *S<sub>p</sub>* enantiomer of [(biaryl-ester)Cr(CO)<sub>3</sub>], complex **1'**, with the atomic numbering. Ellipsoids are displayed at the 50% probability level.

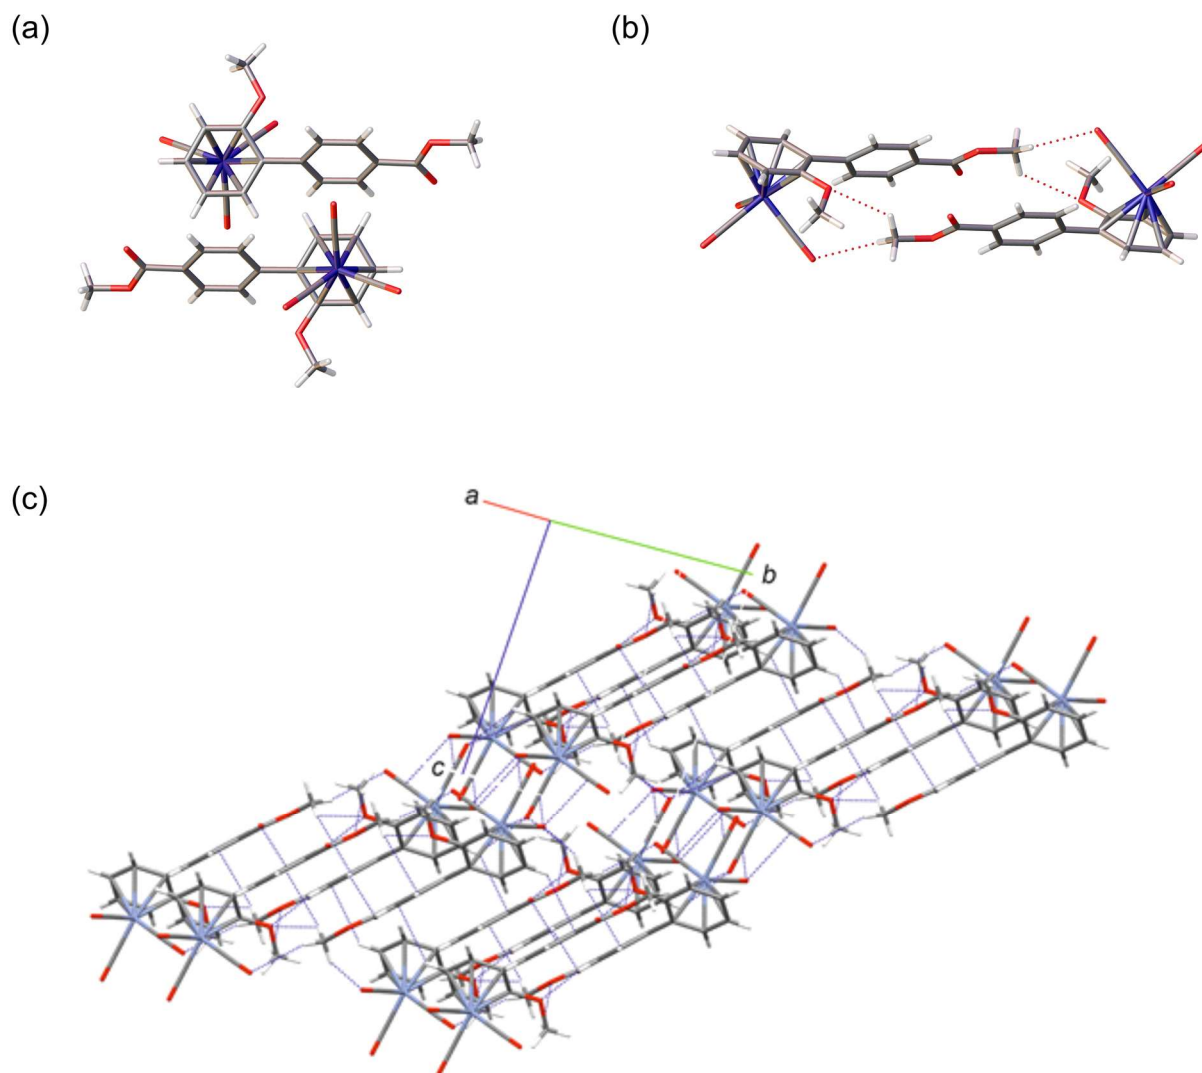

**Figure S17.** (a) The two enantiomers within the unit cell of **1'**. (b) Tail-to-tail dimers of **1'**. (c) Packing of **1'** in the crystal. Short contacts are indicated by blue and red broken lines, respectively.

**Table S2.** Crystal data and structure refinement for **3-OH**.

|                                                              |                                                                              |
|--------------------------------------------------------------|------------------------------------------------------------------------------|
| Empirical formula                                            | C <sub>56</sub> H <sub>55</sub> CrF <sub>6</sub> O <sub>6</sub> P            |
| Formula weight                                               | 1020.97                                                                      |
| Temperature / K                                              | 100                                                                          |
| Crystal system                                               | monoclinic                                                                   |
| Space group                                                  | <i>P</i> 2 <sub>1</sub> / <i>c</i>                                           |
| <i>a</i> / Å                                                 | 20.7617(8)                                                                   |
| <i>b</i> / Å                                                 | 13.7170(3)                                                                   |
| <i>c</i> / Å                                                 | 17.9942(7)                                                                   |
| $\alpha$ / °                                                 | 90                                                                           |
| $\beta$ / °                                                  | 101.005(3)                                                                   |
| $\gamma$ / °                                                 | 90                                                                           |
| Volume / Å <sup>3</sup>                                      | 5030.3(3)                                                                    |
| <i>Z</i>                                                     | 4                                                                            |
| $\rho_{\text{calc}}$ / cm <sup>3</sup>                       | 1.348                                                                        |
| $\mu$ / mm <sup>-1</sup>                                     | 0.332                                                                        |
| <i>F</i> (000)                                               | 2128.0                                                                       |
| Crystal size / mm <sup>3</sup>                               | 0.4 × 0.267 × 0.2                                                            |
| Radiation                                                    | Mo K $\alpha$ ( $\lambda$ = 0.71073)                                         |
| 2 $\Theta$ range for data collection / °                     | 4.612 to 51.912                                                              |
| Index ranges                                                 | −25 ≤ <i>h</i> ≤ 25, −16 ≤ <i>k</i> ≤ 16, −22 ≤ <i>l</i> ≤ 19                |
| Reflections collected                                        | 22453                                                                        |
| Independent reflections                                      | 9749 [ <i>R</i> <sub>int</sub> = 0.0401, <i>R</i> <sub>sigma</sub> = 0.0570] |
| Data/restraints/parameters                                   | 9749/185/791                                                                 |
| Goodness-of-fit on <i>F</i> <sup>2</sup>                     | 1.033                                                                        |
| Final <i>R</i> indexes [ <i>I</i> ≥ 2 $\sigma$ ( <i>I</i> )] | <i>R</i> <sub>1</sub> = 0.0566, <i>wR</i> <sub>2</sub> = 0.1327              |
| Final <i>R</i> indexes [all data]                            | <i>R</i> <sub>1</sub> = 0.0974, <i>wR</i> <sub>2</sub> = 0.1538              |
| Largest diff. peak/hole / e Å <sup>-3</sup>                  | 0.47/−0.54                                                                   |

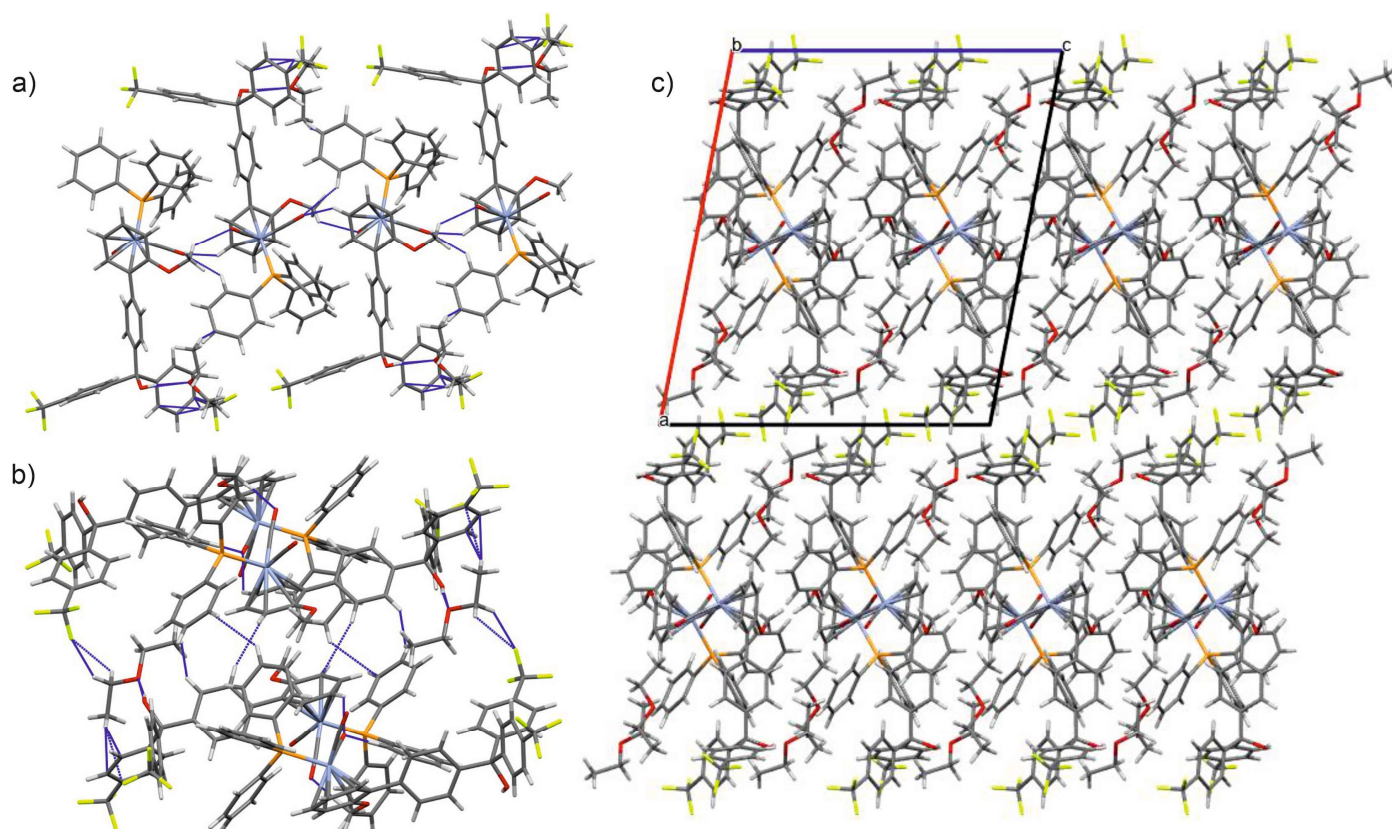

**Figure S18.** a) Chains of alternately aligned  $R_p/S_p$  enantiomers of **3-OH** with short intermolecular contacts indicated by blue broken lines progressing along the  $b$  axis of the unit cell. b) A view of two pairs of  $R_p/S_p$  enantiomers with the hydrogen-bonded ether solvent molecules. Short intermolecular contacts by C-H $\cdots\pi$  and C-H $\cdots$ F interactions are indicated by blue broken lines. c) Packing of the molecules within the unit cell as viewed along the  $b$  axis.

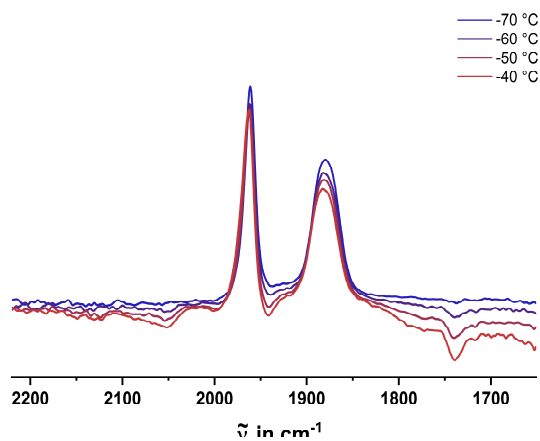

**Figure S19.** IR spectra of complex **1**<sup>+</sup> in CH<sub>2</sub>Cl<sub>2</sub> at temperatures between -70 and -40 °C.

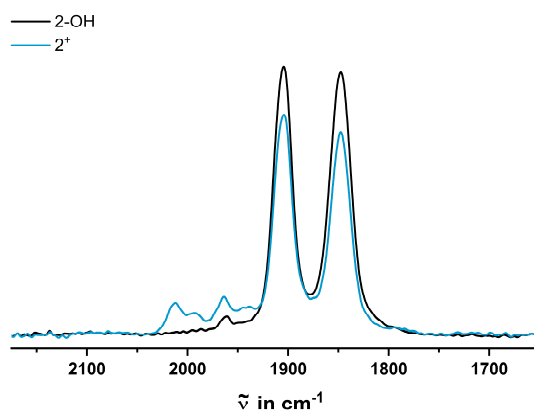

**Figure S20.** Baseline-corrected IR spectra of **2-OH** and **2**<sup>+</sup> in CH<sub>2</sub>Cl<sub>2</sub> at -70 °C.

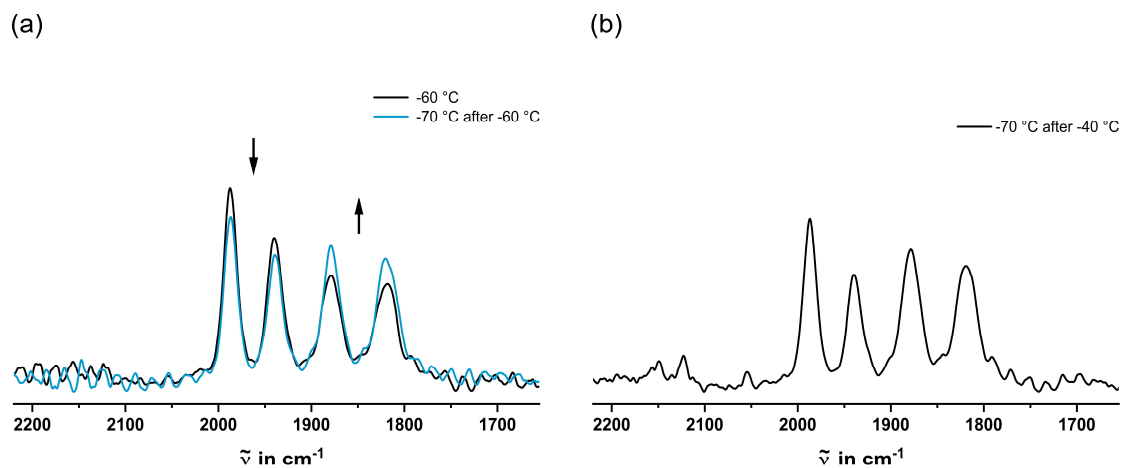

**Figure S21.** IR spectra of **3**<sup>+</sup> in CH<sub>2</sub>Cl<sub>2</sub> at (a) -70 after warming to -60 °C; (b) -70 after warming to -40 °C.

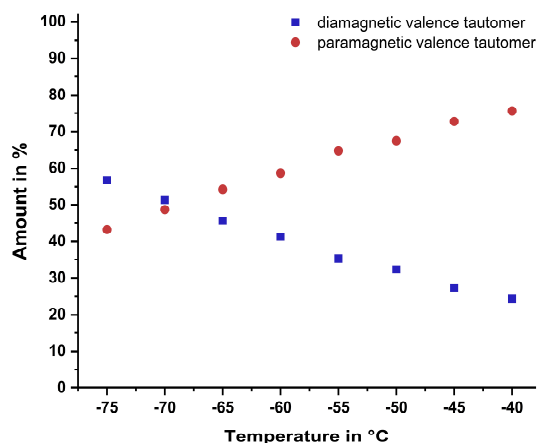

**Figure S22.** Amounts of the distinct valence tautomers of  $3^+$  between  $-70$  and  $-40$  °C.

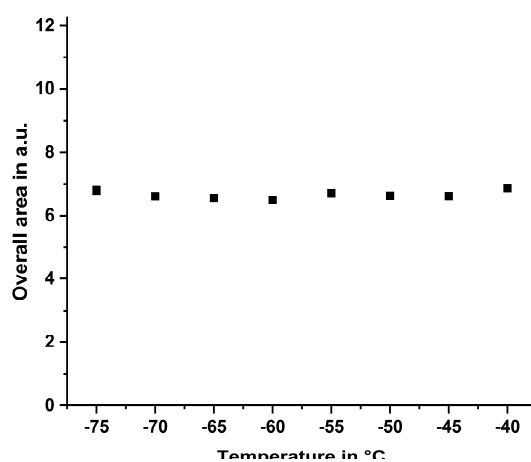

**Figure S23.** Total area of all carbonyl bands of complex  $3^+$  within the temperature range from  $-70$  to  $-40$  °C.

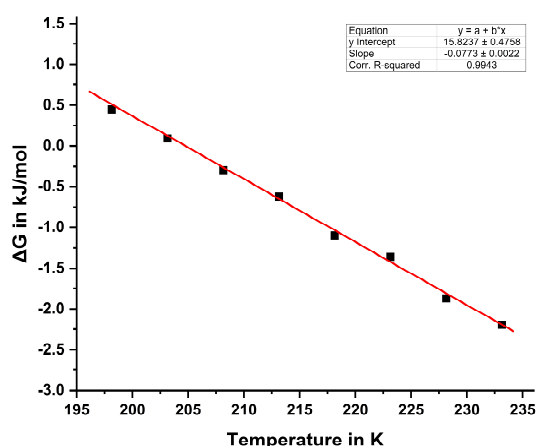

**Figure S24.** Plot of  $\Delta G$  against  $T$  for  $3^+$  with a linear regression line.

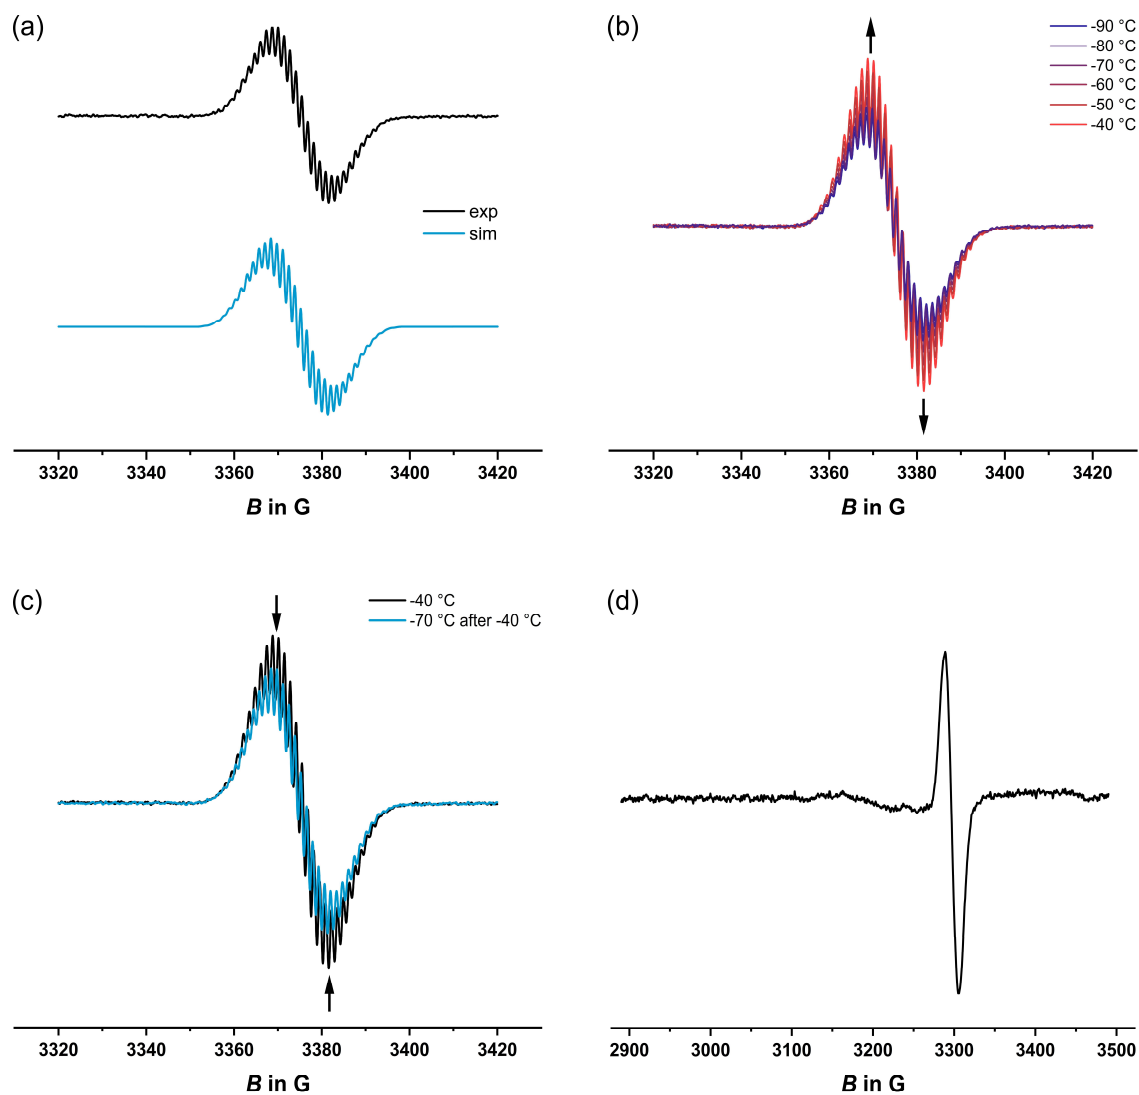

**Figure S25.** (a) EPR spectrum of  $1^+$  in  $\text{CH}_2\text{Cl}_2$  at  $-70\text{ }^\circ\text{C}$  (black) and corresponding simulation (blue). (b) EPR spectra of  $1^+$  in  $\text{CH}_2\text{Cl}_2$  at temperatures between  $-90$  and  $-40\text{ }^\circ\text{C}$ . (c) EPR spectrum of  $1^+$  at  $-70$  after warming to  $-40\text{ }^\circ\text{C}$ . (d) EPR spectrum of  $1^+$  in frozen  $\text{CH}_2\text{Cl}_2$  at  $77\text{ K}$ .

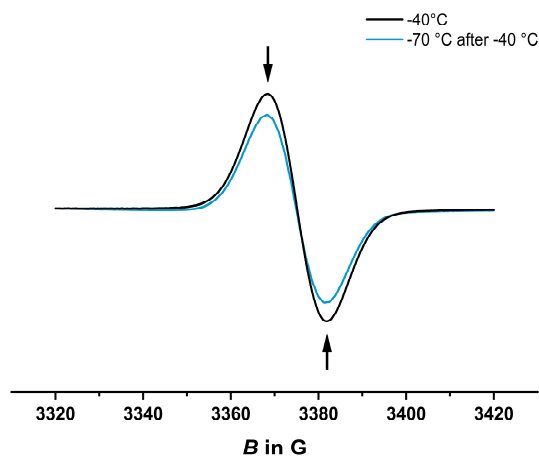

**Figure S26.** EPR spectra of  $3^+$  in  $\text{CH}_2\text{Cl}_2$  at  $-40\text{ }^\circ\text{C}$  (black) and at  $-70$  after warming to  $-40\text{ }^\circ\text{C}$  (blue).

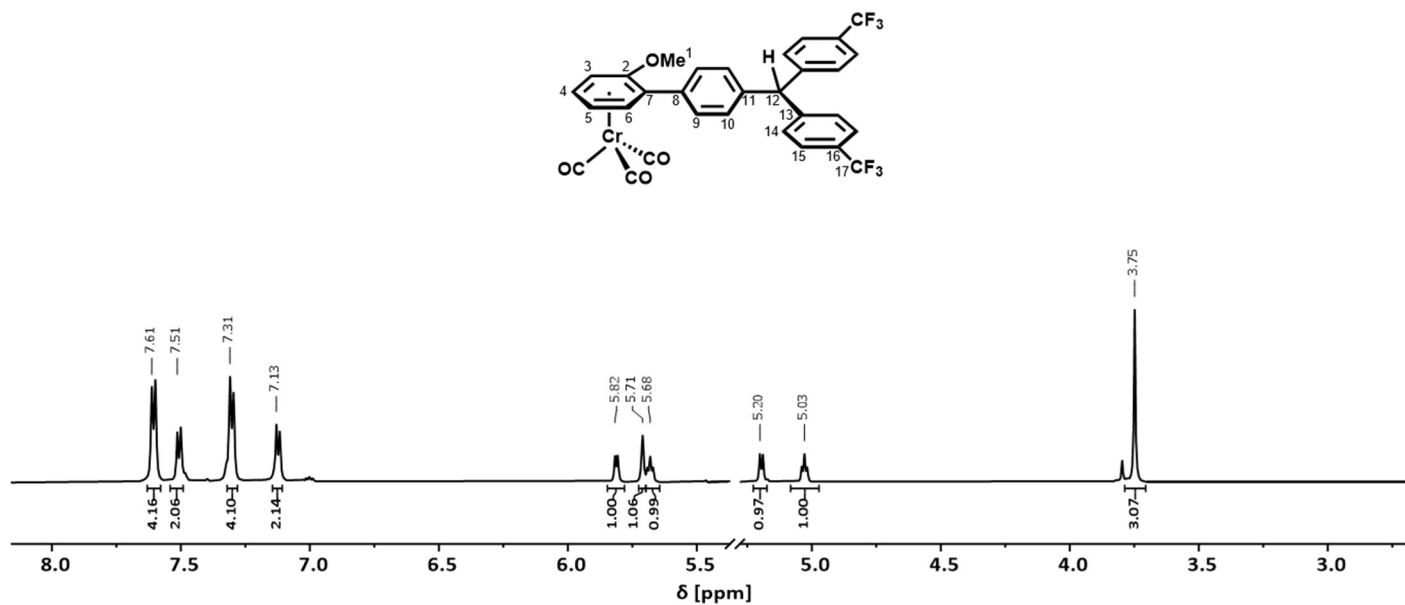

Figure S27.  $^1\text{H}$ -NMR spectrum of complex **1-H** (600 MHz,  $\text{CD}_2\text{Cl}_2$ ).

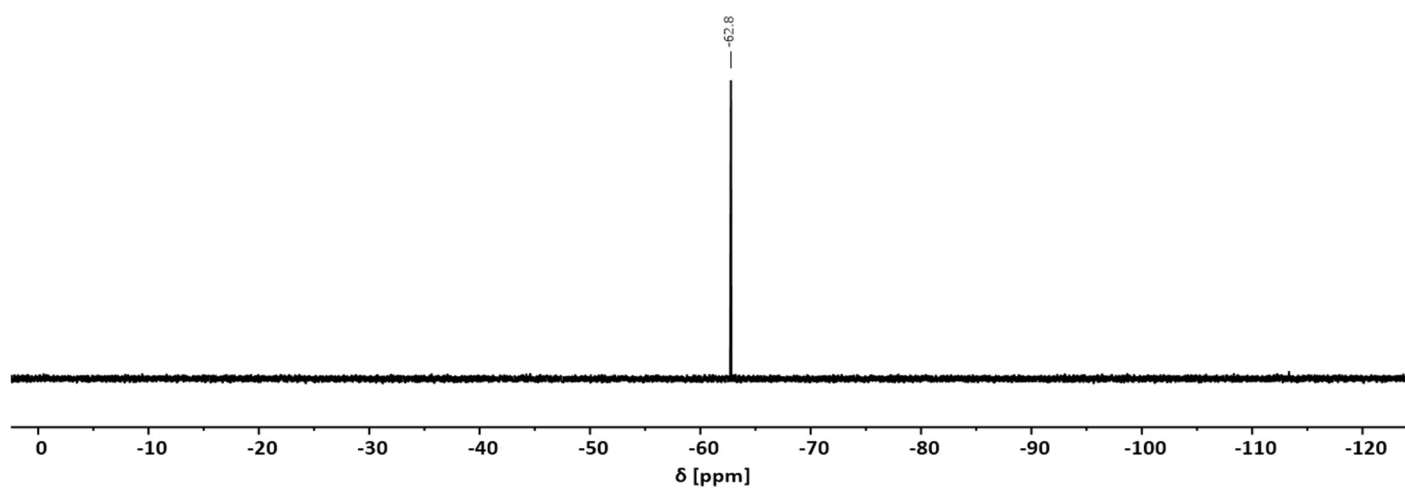

Figure S28.  $^{19}\text{F}\{^1\text{H}\}$ -NMR spectrum of complex **1-H** (376 MHz,  $\text{CD}_2\text{Cl}_2$ ).

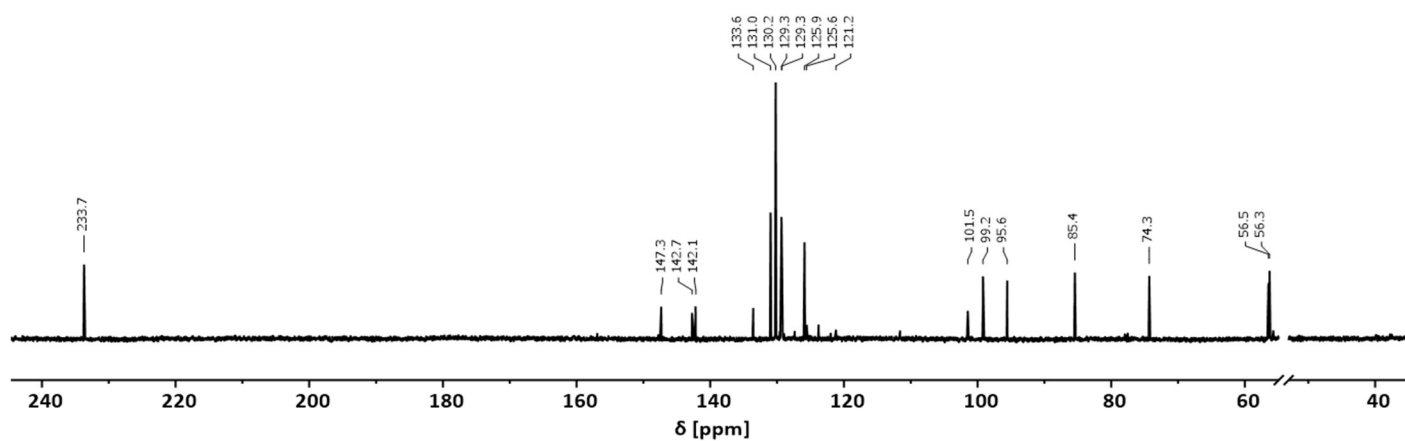

Figure S29.  $^{13}\text{C}\{^1\text{H}\}$ -NMR spectrum of complex **1-H** (151 MHz,  $\text{CD}_2\text{Cl}_2$ ).

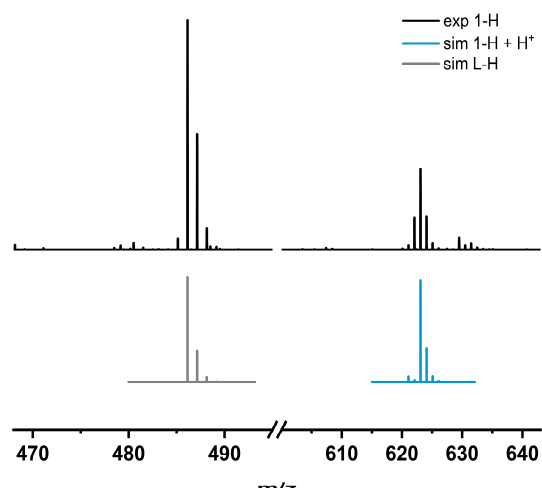

**Figure S30.** Experimental (black) and simulated (1-H + H<sup>+</sup> blue, L-H grey) mass spectrum of complex 1-H.

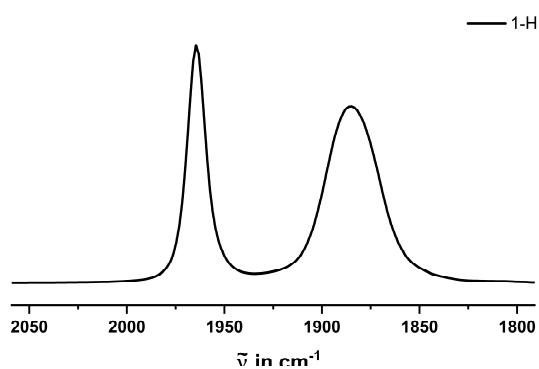

**Figure S31.** Carbonyl-region of the IR spectrum of complex 1-H in CH<sub>2</sub>Cl<sub>2</sub>.

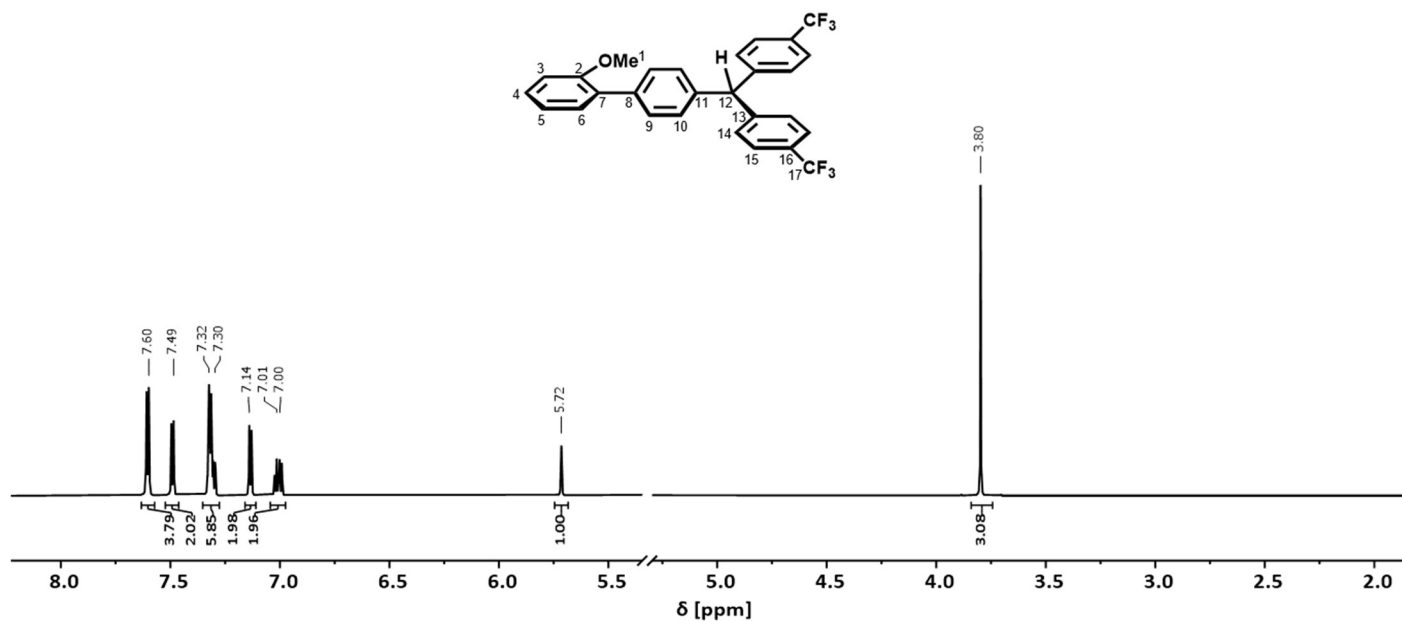

**Figure S32.** <sup>1</sup>H-NMR spectrum of L-H (800 MHz, CD<sub>2</sub>Cl<sub>2</sub>).

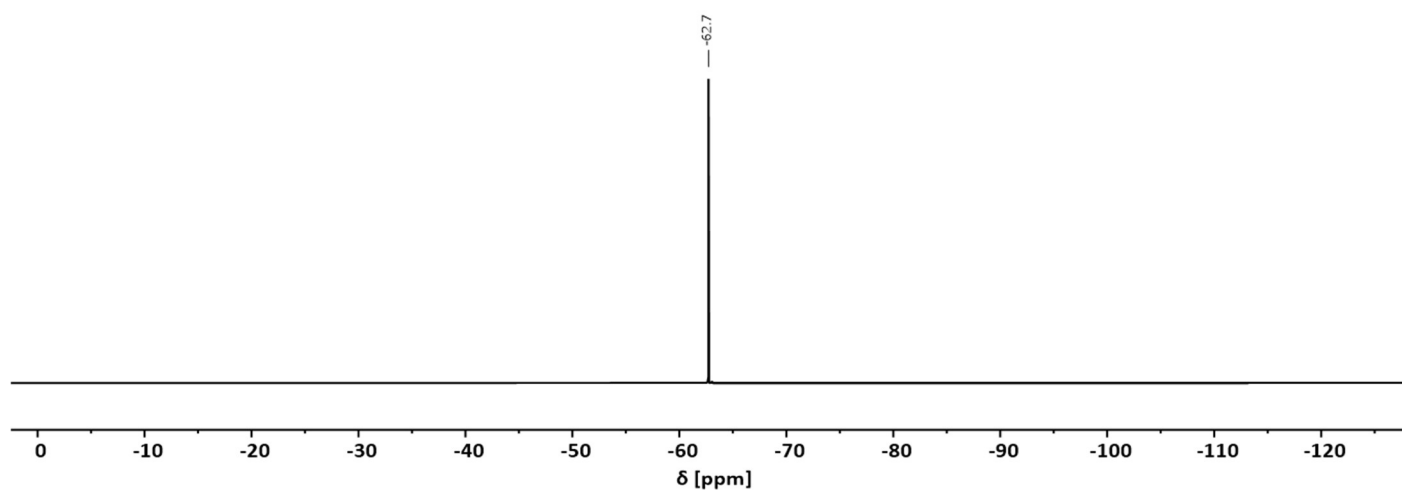

**Figure S33.**  $^{19}\text{F}\{^1\text{H}\}$ -NMR spectrum of **L-H** (752 MHz,  $\text{CD}_2\text{Cl}_2$ ).

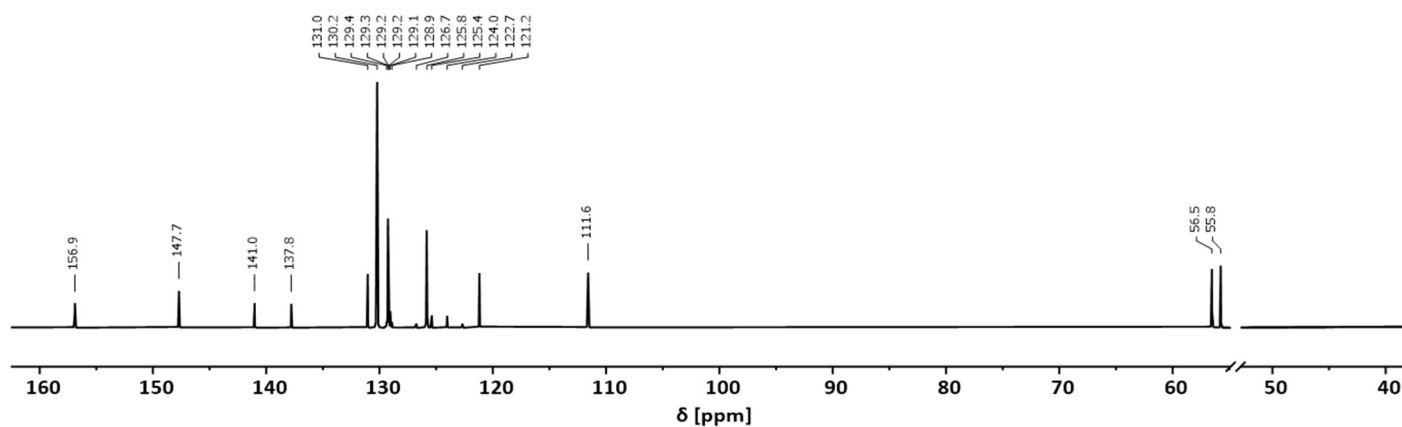

**Figure S34.**  $^{13}\text{C}\{^1\text{H}\}$ -NMR spectrum of **L-H** (202 MHz,  $\text{CD}_2\text{Cl}_2$ ).

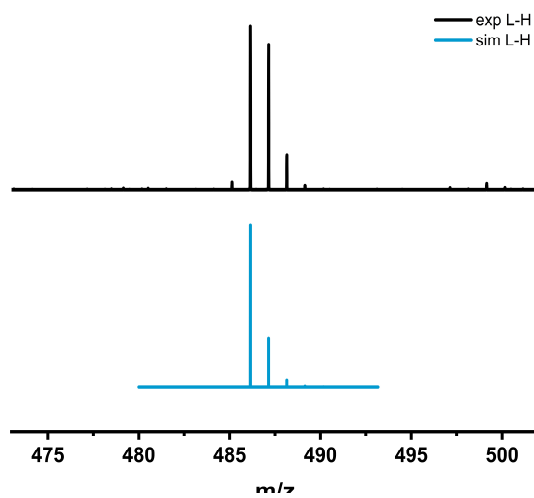

**Figure S35.** Experimental (black) and simulated (blue) mass spectrum of **L-H**.

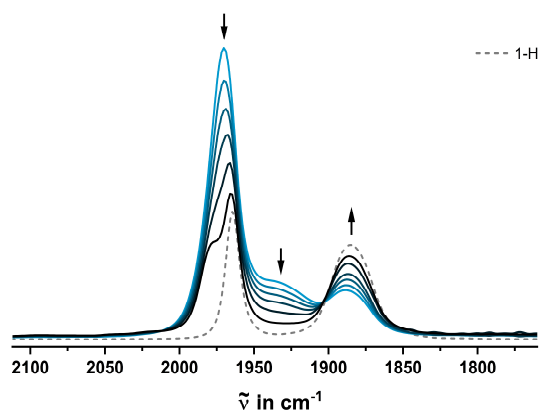

**Figure S36.** IR spectra recorded during decomposition of  $1^+$  at r.t. The grey broken line represents the IR spectrum of complex **1-H**.

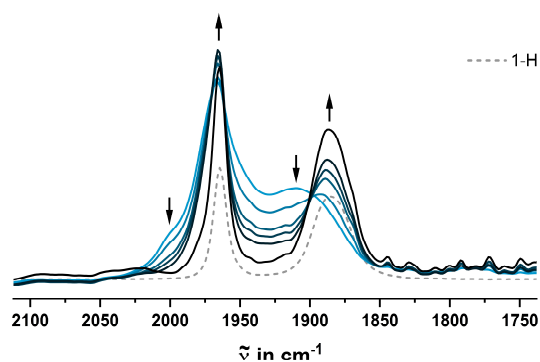

**Figure S37.** IR spectra recorded during decomposition of  $2^+$  at r.t. The grey broken line represents the IR spectrum of complex **1-H**.

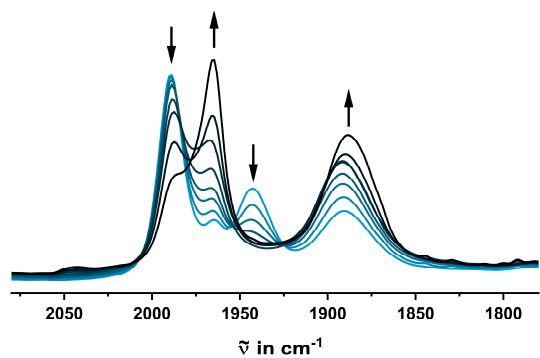

**Figure S38.** IR spectra recorded during decomposition of  $3^+$  at r.t.

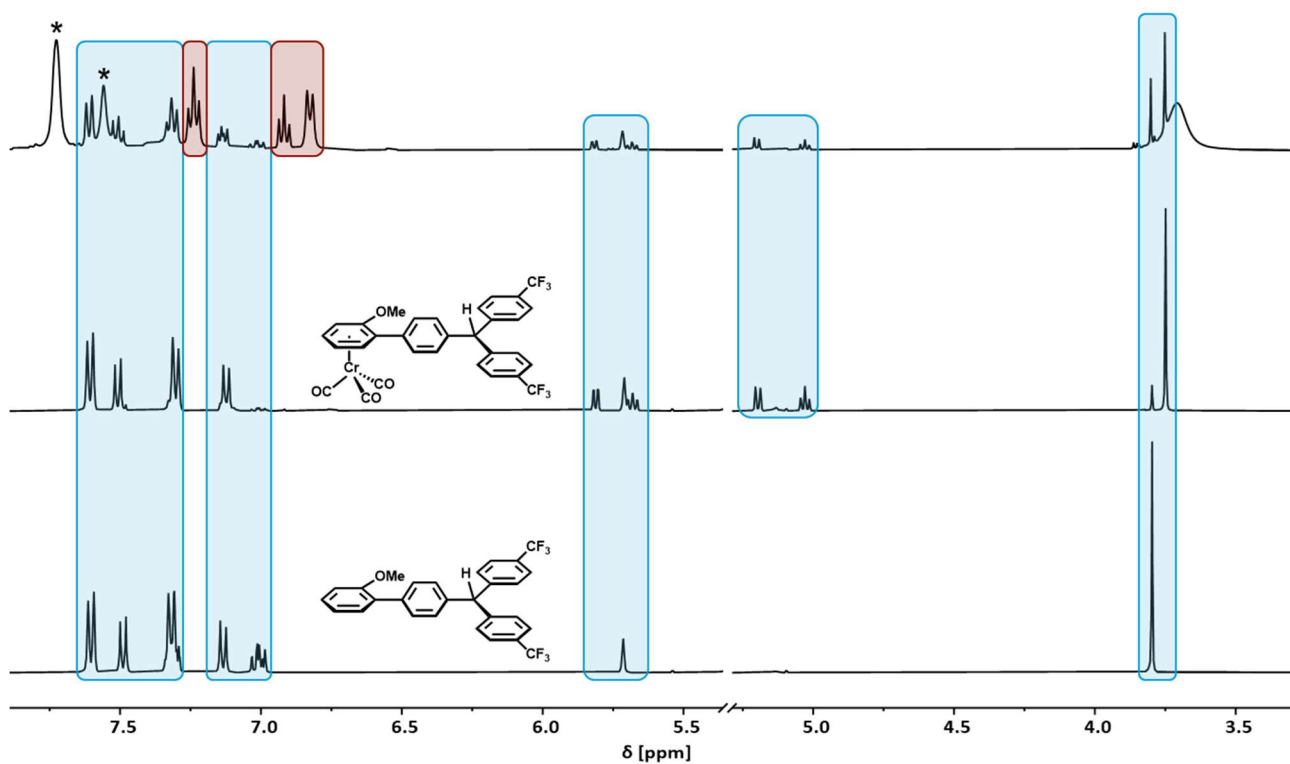

**Figure S39.**  $^1\text{H}$ -NMR spectra of  $2^+$  (top, 12 h after addition of Brookhart's acid at r.t.) and its decomposition products  $1\text{-H}$  (middle) and  $L\text{-H}$  (bottom) (400 MHz,  $\text{CD}_2\text{Cl}_2$ ).  $[\text{Bar}^{\text{F}_{24}}]^-$  signals are marked with asterisks. The signals marked in red could be assigned to phenol.

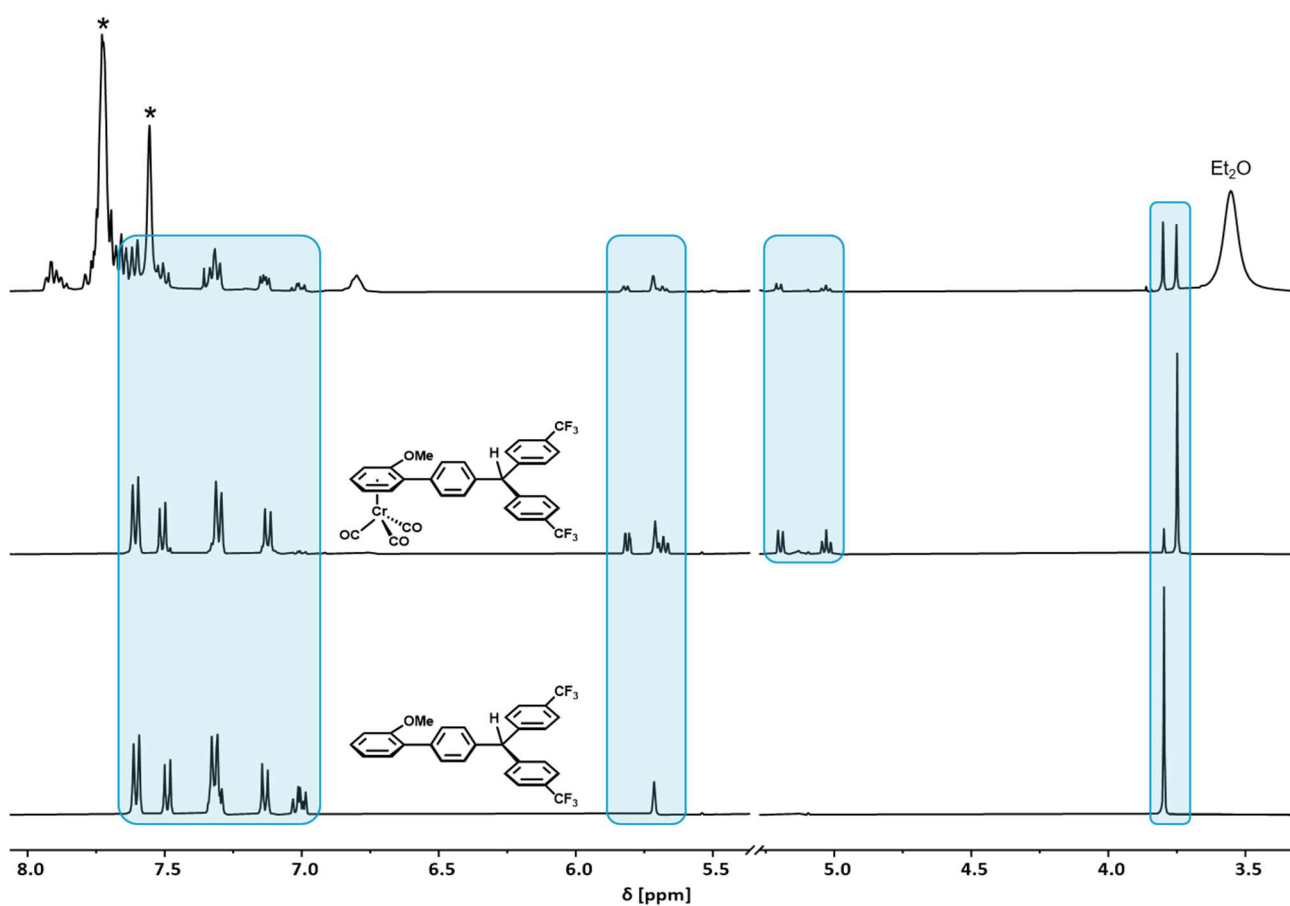

**Figure S40.**  $^1\text{H}$ -NMR spectra of  $2^+$  (top, 12 h after addition of Brookhart's acid at r.t.) and its decomposition products  $1\text{-H}$  (middle) and  $L\text{-H}$  (bottom) (400 MHz,  $\text{CD}_2\text{Cl}_2$ ).  $[\text{Bar}^{\text{F}_{24}}]^-$  signals are marked with asterisks.

**Table S3.** Crystal data and structure refinement for complex **1-H**.

|                                                              |                                                                              |
|--------------------------------------------------------------|------------------------------------------------------------------------------|
| Empirical formula                                            | C <sub>31</sub> H <sub>20</sub> CrF <sub>6</sub> O <sub>4</sub>              |
| Formula weight                                               | 622.47                                                                       |
| Temperature / K                                              | 100                                                                          |
| Crystal system                                               | monoclinic                                                                   |
| Space group                                                  | <i>P</i> 2 <sub>1</sub> / <i>n</i>                                           |
| <i>a</i> / Å                                                 | 17.2787(10)                                                                  |
| <i>b</i> / Å                                                 | 7.6071(6)                                                                    |
| <i>c</i> / Å                                                 | 20.5128(12)                                                                  |
| $\alpha$ / °                                                 | 90                                                                           |
| $\beta$ / °                                                  | 95.142(5)                                                                    |
| $\gamma$ / °                                                 | 90                                                                           |
| Volume / Å <sup>3</sup>                                      | 2685.4(3)                                                                    |
| <i>Z</i>                                                     | 4                                                                            |
| $\rho_{\text{calc}}$ / cm <sup>3</sup>                       | 1.540                                                                        |
| $\mu$ / mm <sup>-1</sup>                                     | 4.216                                                                        |
| <i>F</i> (000)                                               | 1264.0                                                                       |
| Crystal size / mm <sup>3</sup>                               | 0.17 × 0.068 × 0.015                                                         |
| Radiation                                                    | Cu K $\alpha$ ( $\lambda$ = 1.54186)                                         |
| 2 $\Theta$ range for data collection / °                     | 6.412 to 132.054                                                             |
| Index ranges                                                 | -20 ≤ <i>h</i> ≤ 20, -8 ≤ <i>k</i> ≤ 7, -24 ≤ <i>l</i> ≤ 19                  |
| Reflections collected                                        | 12293                                                                        |
| Independent reflections                                      | 4489 [ <i>R</i> <sub>int</sub> = 0.1260, <i>R</i> <sub>sigma</sub> = 0.1315] |
| Data/restraints/parameters                                   | 4489/78/437                                                                  |
| Goodness-of-fit on <i>F</i> <sup>2</sup>                     | 1.189                                                                        |
| Final <i>R</i> indexes [ <i>I</i> ≥ 2 $\sigma$ ( <i>I</i> )] | <i>R</i> <sub>1</sub> = 0.1280, w <i>R</i> <sub>2</sub> = 0.3053             |
| Final <i>R</i> indexes [all data]                            | <i>R</i> <sub>1</sub> = 0.2236, w <i>R</i> <sub>2</sub> = 0.3873             |
| Largest diff. peak/hole / e Å <sup>-3</sup>                  | 1.45/-0.93                                                                   |

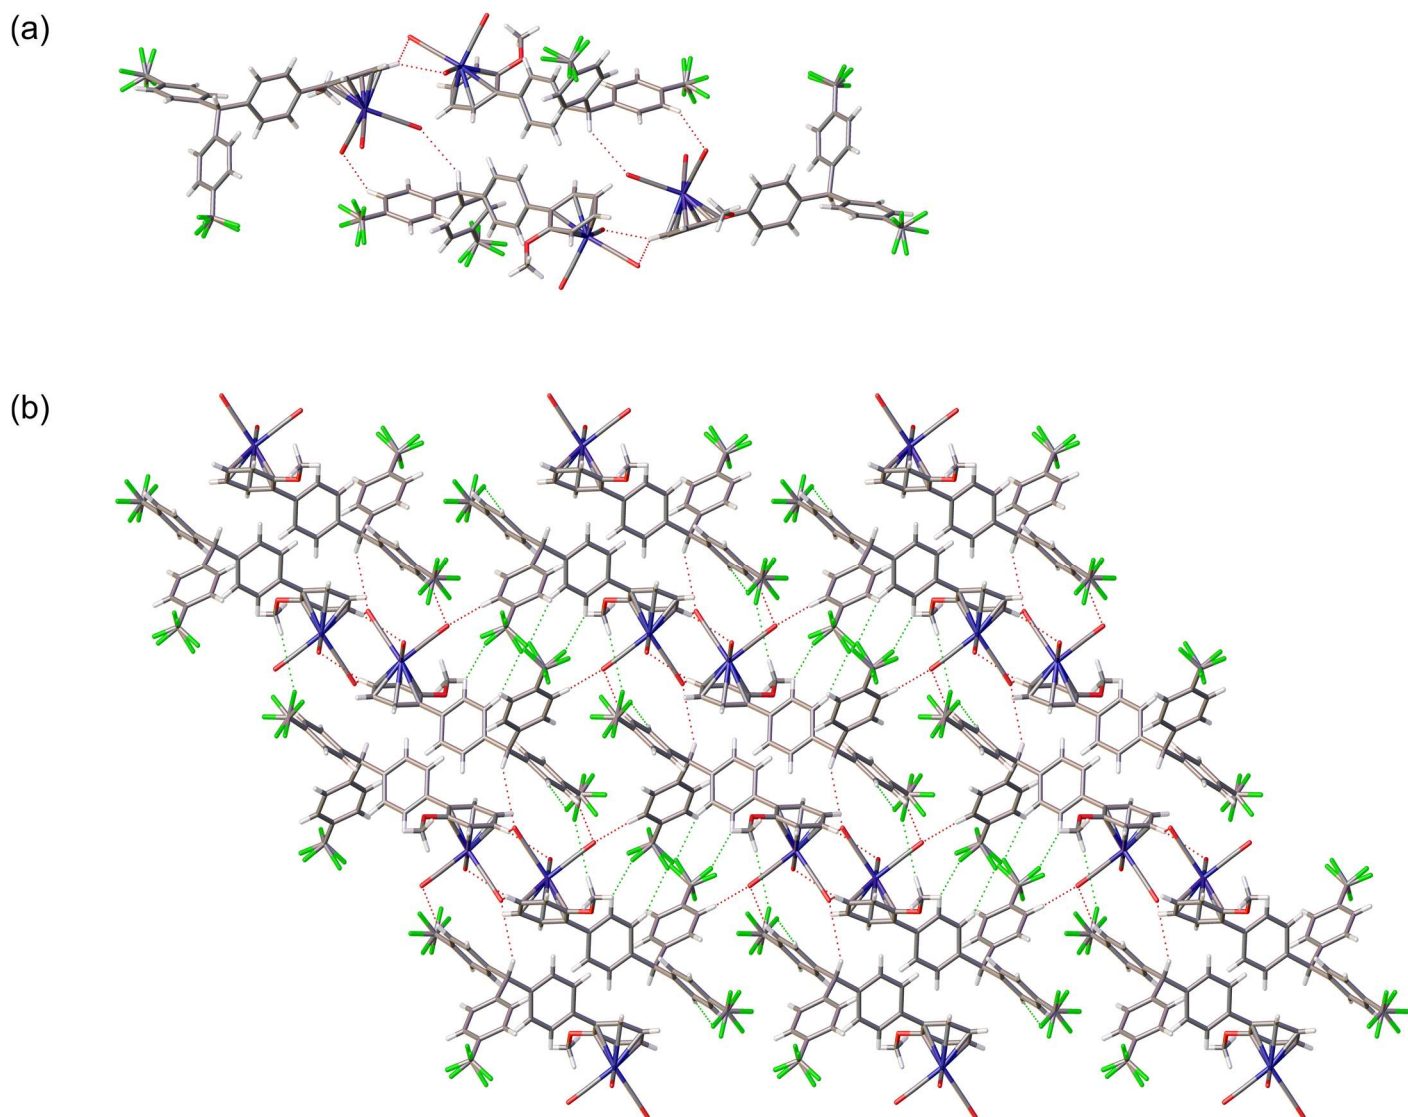

**Figure S41.** (a) Packing of two  $R_P$  and  $S_P$  enantiomers each of **1-H** within the unit cell. (b) Packing of the units; view along the  $b$  axis. Short contacts are indicated by red broken lines.

**Table S4.** Crystal data and structure refinement for **L-H**.

|                                                |                                                                    |
|------------------------------------------------|--------------------------------------------------------------------|
| Empirical formula                              | C <sub>28</sub> H <sub>20</sub> F <sub>6</sub> O <sub>1.04</sub>   |
| Formula weight                                 | 487.08                                                             |
| Temperature / K                                | 100                                                                |
| Crystal system                                 | orthorhombic                                                       |
| Space group                                    | <i>Pbca</i>                                                        |
| <i>a</i> / Å                                   | 9.6538(4)                                                          |
| <i>b</i> / Å                                   | 18.3824(6)                                                         |
| <i>c</i> / Å                                   | 25.4401(7)                                                         |
| $\alpha$ / °                                   | 90                                                                 |
| $\beta$ / °                                    | 90                                                                 |
| $\gamma$ / °                                   | 90                                                                 |
| Volume / Å <sup>3</sup>                        | 4514.6(3)                                                          |
| <i>Z</i>                                       | 8                                                                  |
| $\rho_{\text{calc}}$ / cm <sup>3</sup>         | 1.433                                                              |
| $\mu$ / mm <sup>-1</sup>                       | 0.120                                                              |
| <i>F</i> (000)                                 | 2003.0                                                             |
| Crystal size / mm <sup>3</sup>                 | 0.3 × 0.25 × 0.2                                                   |
| Radiation                                      | Mo K $\alpha$ ( $\lambda$ = 0.71073)                               |
| 2 $\Theta$ range for data collection / °       | 5.028 to 55.118                                                    |
| Index ranges                                   | $-12 \leq h \leq 12$ , $-23 \leq k \leq 22$ , $-33 \leq l \leq 30$ |
| Reflections collected                          | 17345                                                              |
| Independent reflections                        | 5176 [ $R_{\text{int}}$ = 0.0228, $R_{\text{sigma}}$ = 0.0206]     |
| Data/restraints/parameters                     | 5176/62/375                                                        |
| Goodness-of-fit on $F^2$                       | 1.103                                                              |
| Final <i>R</i> indexes [ $I \geq 2\sigma(I)$ ] | $R_1$ = 0.0415, $wR_2$ = 0.0905                                    |
| Final <i>R</i> indexes [all data]              | $R_1$ = 0.0611, $wR_2$ = 0.1088                                    |
| Largest diff. peak/hole / e Å <sup>-3</sup>    | 0.29/−0.23                                                         |

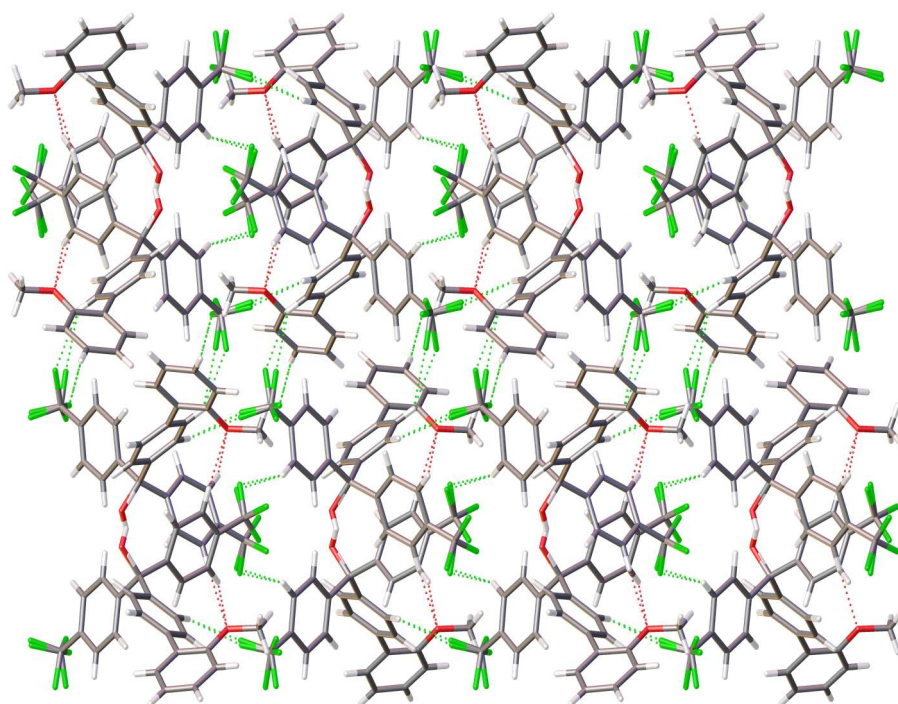**Figure S42.** Packing of **L-H**; view along the *a* axis.

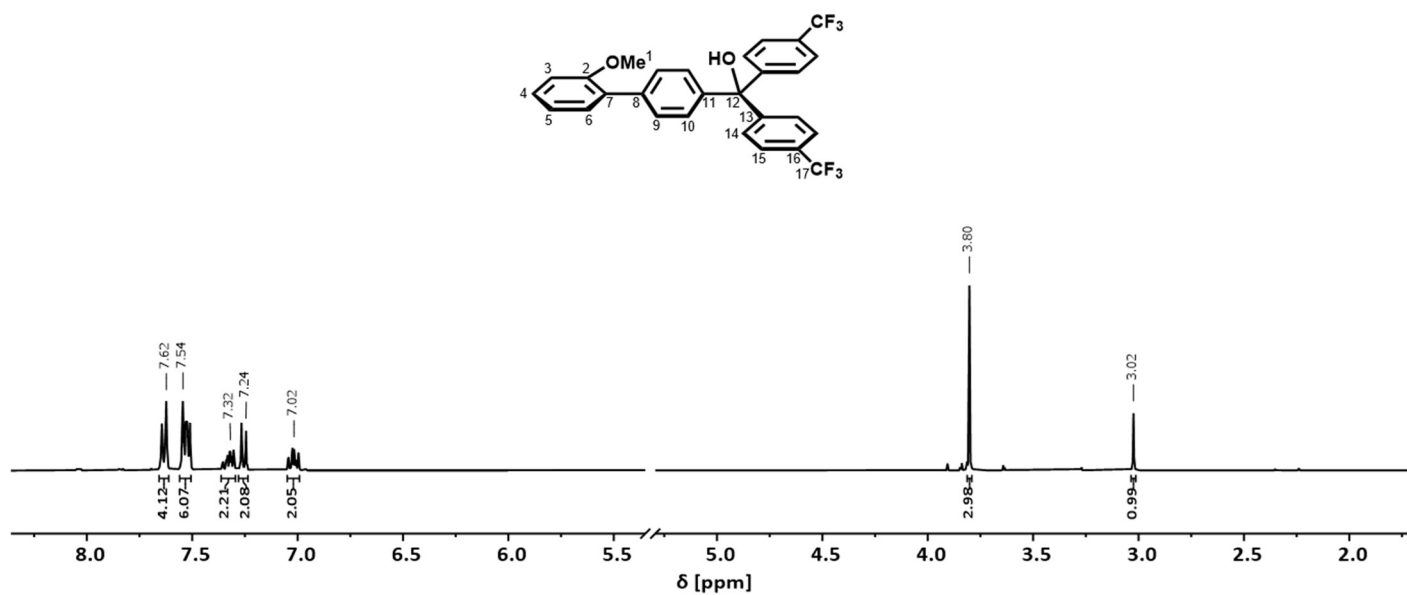

Figure S43. <sup>1</sup>H-NMR spectrum of L-OH (400 MHz, CD<sub>2</sub>Cl<sub>2</sub>).

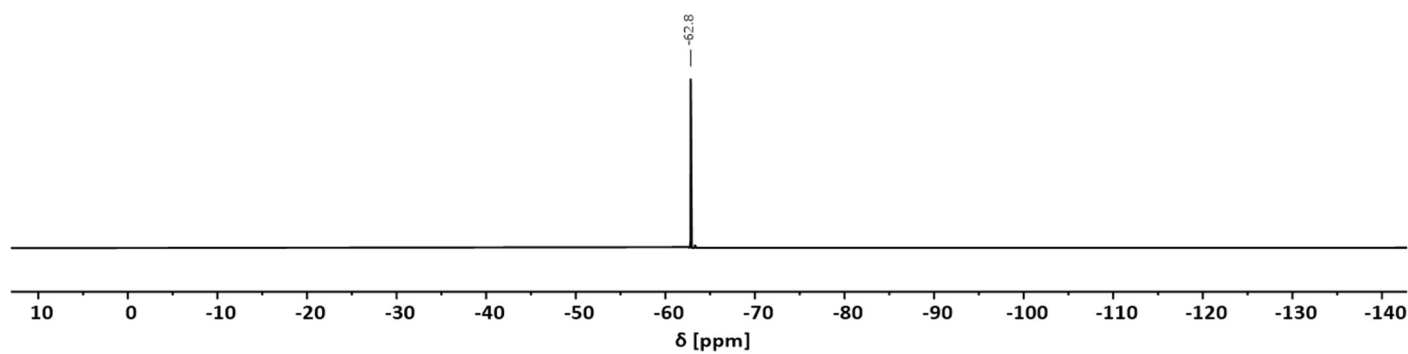

Figure S44. <sup>19</sup>F[<sup>1</sup>H]-NMR spectrum of L-OH (376 MHz, CD<sub>2</sub>Cl<sub>2</sub>).

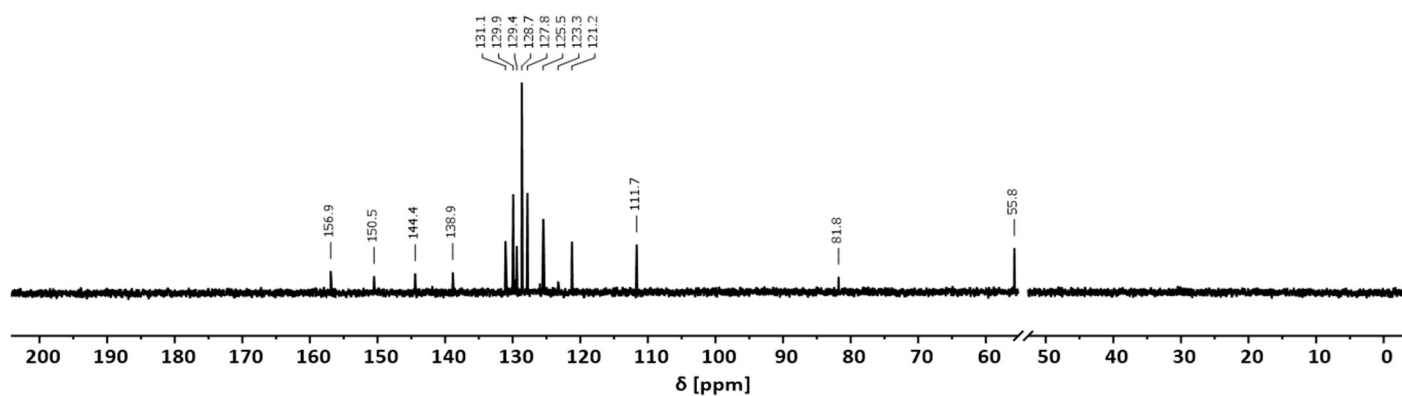

Figure S45. <sup>13</sup>C[<sup>1</sup>H]-NMR spectrum of L-OH (101 MHz, CD<sub>2</sub>Cl<sub>2</sub>).

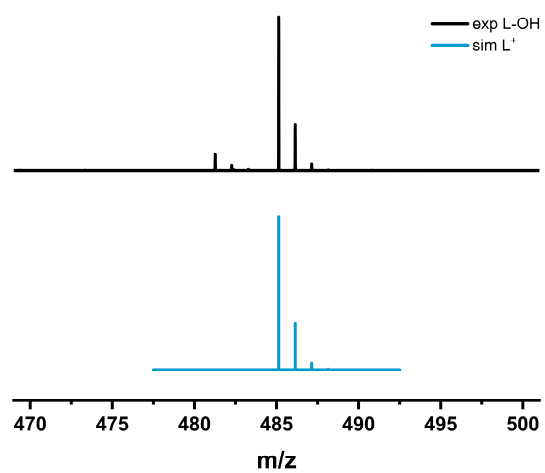

**Figure S46.** Experimental (black) and simulated (blue) mass spectrum of L-OH.
